# Supplementary material for: Recruitment in Health Services Research—A Study on Facilitators and Barriers for the Recruitment of Community-Based Healthcare Providers
Source: MDPI journal article supplement (doi:10.3390/ijerph181910521), 2021-10-07
Supplement: s1 [file s1]

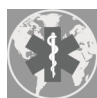

## Topics of the Interviewguide

| Topic                                     | Question                                                                                                                                  |
|-------------------------------------------|-------------------------------------------------------------------------------------------------------------------------------------------|
| Icebreaker question                       | Please tell me about how you were involved in recruiting health care providers.                                                           |
| Motivation for participation in the trial | What do you say was the reason for health care providers to participate in the project?                                                   |
| Refusal to participate in the trial       | What reasons for refusal to participate did health care providers communicate to you?                                                     |
|                                           | In your opinion, are there any other reasons why health care providers did not want to participate which they did not explicitly express? |
| Recruitment strategy                      | What was the most difficult aspect in recruiting health care providers to the trial?                                                      |
|                                           | Which recruitment strategies have been most successful in your opinion?                                                                   |
| Recruitment of patients                   | Are there commonalities among actively recruiting physician practices?                                                                    |
|                                           | Which barriers for recruitment of patients did health care providers report to you?                                                       |
| Ideas for optimization                    | What would you do differently if you were planning to recruit for a similar trial?                                                        |
