# Supplementary material for: Recruitment in Health Services Research—A Study on Facilitators and Barriers for the Recruitment of Community-Based Healthcare Providers
Source: MDPI journal article supplement (doi:10.3390/ijerph181910521), 2021-10-07
Supplement: s1 [file s1]

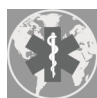

#### Additional File 1: Data base for the documentary analysis

| Document type                                                                                                        | Number of available documents | Number of documents included in the analysis |
|----------------------------------------------------------------------------------------------------------------------|-------------------------------|----------------------------------------------|
| Records of trial staff meetings and telephone conferences                                                            | 21                            | 19                                           |
| Records of health care provider training-sessions                                                                    | 23                            | 12                                           |
| Records of information events, quality circles and meetings with occupational associations to inform about the trial | 17                            | 14                                           |
| Records of recruitment planning meetings                                                                             | 7                             | 7                                            |
| Records of regular meetings between study coordinators and research team                                             | 30                            | 27                                           |
| Feedback of enrolled health care providers                                                                           | 26                            | 10                                           |
| Recruitment material (flyer, letters)                                                                                | 2                             | 0                                            |
| Records of study coordinator meetings                                                                                | 11                            | 10                                           |
| <b>Summe</b>                                                                                                         | <b>137</b>                    | <b>99</b>                                    |

\* These are process-produced data that were not created solely for the purpose of scientific evaluation. Various participants contributed to the creation of the records. After the records were created, they were circulated among the team, thus generating an internal consensus within the project.
